# Supplementary material for: A mechanistic study of cyclic siloxane pyrolyses at low pressures
Source: Royal Society of Chemistry journal article supplement (doi:10.1039/b812535j), 2008-01-01
Supplement: b812535j.pdf [file b812535j.pdf]

## Supplementary Information

### A Mechanistic Study of Cyclic Siloxane Pyrolyses at Low Pressures

Matthew J. Almond, Rosa Becerra, Sarah J. Bowes, John P. Cannady, J. Steven Ogden\* and Robin Walsh\*.

#### Contents

1. **Table S1** Molecular and transition state parameters for RRKM calculation for dimethylsiloxane decomposition at 983 K.
2. **Table S2** RRKM calculated values for  $k_{1a}$  as a function of temperature and pressure.
3. **Table S3** Values for  $k_{4a}$  estimated from ref 2s, assumed temperature independent in the range 950 – 1000 K.
4. **Table S4** Values for  $k_2$  estimated from ref 3s.

**Table S1** Molecular and transition state parameters for RRKM calculation for dimethylsiloxane decomposition at 983 K.

|                                                                     | dimethylsiloxane  | TS1a                 | TS8                  |
|---------------------------------------------------------------------|-------------------|----------------------|----------------------|
| $\tilde{\nu} / \text{cm}^{-1}$                                      | 2949(2)           | 2949(2)              | 3014(1)              |
|                                                                     | 2905(1)           | 2905(1)              | 2965(1)              |
|                                                                     | 2902(1)           | 2902(1)              | 2942(1)              |
|                                                                     | 2852(1)           | 2852(1)              | 2915(1)              |
|                                                                     | 2849(1)           | 2849(1)              | 2859(1)              |
|                                                                     | 1433(1)           | 1433(1)              | 1729(1)              |
|                                                                     | 1427(1)           | 1427(1)              | 1441(1)              |
|                                                                     | 1421(1)           | 1421(1)              | 1420(1)              |
|                                                                     | 1419(1)           | 1419(1)              | 1391(1)              |
|                                                                     | 1299(1)           | 1299(1)              | 1265(1)              |
|                                                                     | 1293(1)           | 1293(1)              | 1258(1)              |
|                                                                     | 1211(1)           | 1211(1)              | 1224(1)              |
|                                                                     | 840(1)            | 840(1)               | 871(1)               |
|                                                                     | 788(1)            | 783(1)               | 840(1)               |
|                                                                     | 783(1)            | 659(1)               | 787(1)               |
|                                                                     | 675(1)            | 288(1)               | 738(1)               |
|                                                                     | 659(1)            | 105(1)               | 701(1)               |
|                                                                     | 590(1)            | 93(1)                | 568(1)               |
|                                                                     | 288(1)            | 70(1)                | 406(1)               |
|                                                                     | 256(1)            | 57(1)                | 321(1)               |
|                                                                     | 206(1)            | 17(1)                | 259(1)               |
|                                                                     | 62(1)             | 15(1)                | 250(1)               |
|                                                                     | 15(1)             |                      | 56(1)                |
| reaction coordinate/ $\text{cm}^{-1}$                               |                   | 590                  | 659                  |
| path degeneracy                                                     |                   | 2                    | 6                    |
| $A$ factor/ $\text{s}^{-1}$                                         |                   | $8.1 \times 10^{16}$ | $7.1 \times 10^{12}$ |
| $E_0$ (critical energy)/ $\text{kJ mol}^{-1}$                       |                   | 347                  | 339                  |
| $Z_{LJ}/10^{-10} \text{ cm}^3 \text{ molecule}^{-1} \text{ s}^{-1}$ | 8.42 <sup>a</sup> |                      |                      |

<sup>a</sup> Value calculated using the formulas recommended by Troe<sup>1s</sup>.

**Table S2** RRKM calculated values for  $k_{1a}^a$  as a function of temperature and pressure

| <i>T</i> /K | <i>P</i> /Torr          |                         |                         |                         |
|-------------|-------------------------|-------------------------|-------------------------|-------------------------|
|             | 10 <sup>-1</sup>        | 10 <sup>-2</sup>        | 10 <sup>-3</sup>        | 10 <sup>-4</sup>        |
| 950         | 1.55 × 10 <sup>-4</sup> | 4.51 × 10 <sup>-5</sup> | 1.06 × 10 <sup>-5</sup> | 2.05 × 10 <sup>-6</sup> |
| 983         | 3.75 × 10 <sup>-4</sup> | 1.57 × 10 <sup>-4</sup> | 3.54 × 10 <sup>-5</sup> | 6.70 × 10 <sup>-6</sup> |
| 1000        | 1.07 × 10 <sup>-3</sup> | 2.89 × 10 <sup>-4</sup> | 6.38 × 10 <sup>-5</sup> | 1.19 × 10 <sup>-5</sup> |

<sup>a</sup> Units: s<sup>-1</sup>

**Table S3** Values for  $k_{4a}^a$  estimated from ref 2s, assumed temperature independent in the range 950 – 1000 K

| <i>P</i> /Torr          |                         |                         |                         |
|-------------------------|-------------------------|-------------------------|-------------------------|
| 10 <sup>-1</sup>        | 10 <sup>-2</sup>        | 10 <sup>-3</sup>        | 10 <sup>-4</sup>        |
| 6.3 × 10 <sup>-13</sup> | 1.3 × 10 <sup>-13</sup> | 2.0 × 10 <sup>-14</sup> | 2.5 × 10 <sup>-15</sup> |

<sup>a</sup> Units: cm<sup>3</sup> molecule<sup>-1</sup> s<sup>-1</sup>

**Table S4** Values for  $k_2^a$  estimated from ref 3s<sup>b</sup>

| Temp/K                   |                         |                         |
|--------------------------|-------------------------|-------------------------|
| 950                      | 983                     | 1000                    |
| 1.62 × 10 <sup>-14</sup> | 2.2 × 10 <sup>-14</sup> | 2.5 × 10 <sup>-14</sup> |

<sup>a</sup> Units: cm<sup>3</sup> molecule<sup>-1</sup> s<sup>-1</sup>

<sup>b</sup> Assumed the same as for CH<sub>3</sub> + (CH<sub>3</sub>)<sub>2</sub>CO

## References.

- 1s. J. Troe, *J. Chem. Phys.*, 1977, **66**, 4758.
- 2s. S. J. Klippenstein and L. B. Harding, *J. Phys. Chem. A*, 1999, **103**, 9388.
- 3s. S. H. Mousavipour and P. D. Pacey, *J. Phys. Chem.*, 1996, **100**, 3573. [Same as ref. 15 in paper].
